# Supplementary material
Source: PubMed Central journal article supplement (PMC4133149)
Supplement: NIHMS588423-supplement-Acknowledgement_Permission_Form.pdf [file NIHMS588423-supplement-Acknowledgement_Permission_Form.pdf]

# Acknowledgment Permission Form

Journal: Stroke

Manuscript No. STROKE/2013/003502R1

First author: Bernadette Boden-Albala

Title of work: Methodology for a Community Based Stroke Preparedness Intervention:  
The ASPIRE Study

## Acknowledgment Permission:

Authors must provide written permission/approval from all individuals mentioned by name in the Acknowledgements section of a submitted manuscript. By signing this form, any and all acknowledged persons therefore state that they have read and approved the mention of their names in the Acknowledgment section of the aforementioned paper.

Printed Name Marian Emr

Signature: 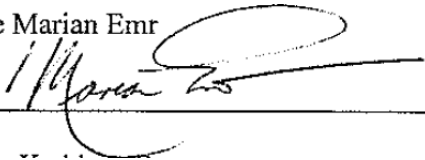

Date

4/2/14

Printed Name Kathleen Burger

Signature: 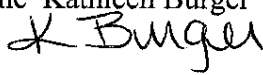

Date

3/27/2014

Printed Name Jennifer Abele

Signature: 

Date

4/7/14

Printed Name Susan <sup>SD</sup> Chinnich

Signature: 

Date

3/28/2014

Printed Name Anna Jayam Trough

Signature: 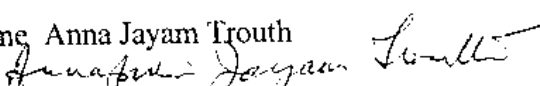

Date

4-2-2014

Printed Name David Wilson

Signature: 

Date

3-29-14

Printed Name: Barney Stern

Signature *Barney Stern* 3/27/2014

Date: \_\_\_\_\_

Printed Name: Brenda Johnson

Signature: *Brenda Johnson*

Date: \_\_\_\_\_

Printed Name Ramesh Khurana

Signature: *R. Khurana*

Date: *3/31/2014*

\_\_\_\_\_
